# Supplementary material
Source: publisher figshare collection journal article supplement (https://acs.figshare.com/ndownloader/files/4635724)
Supplement: Supplementary file 1 [file 4635724]

## Supporting Information

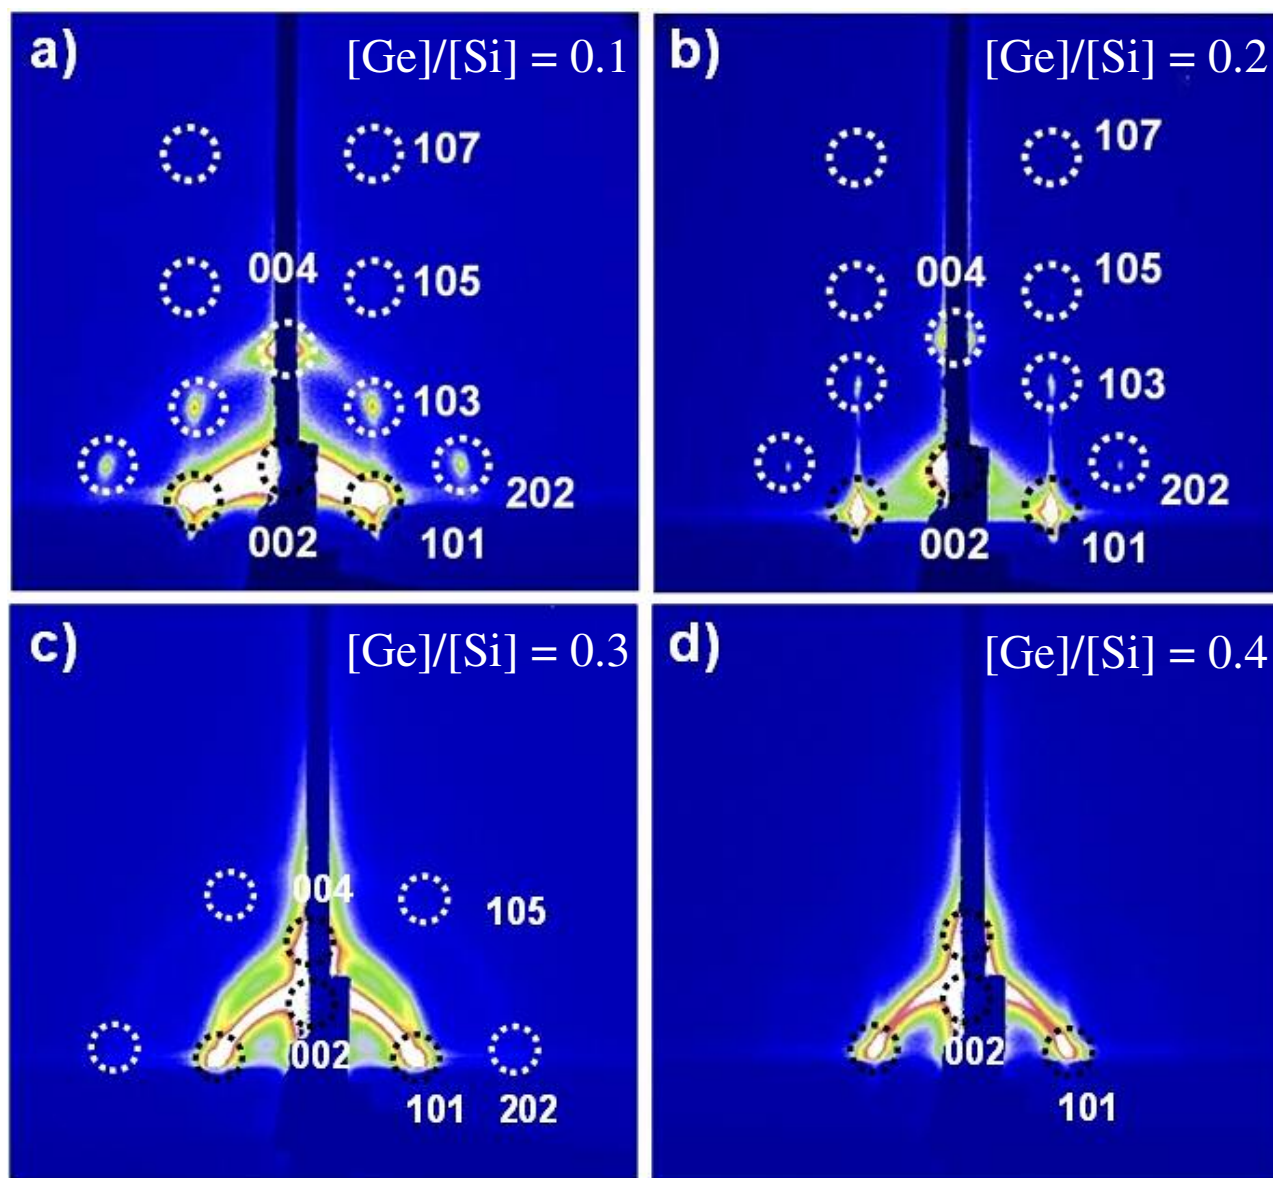

**Fig. S1.** Grazing incidence small-angle X-ray scattering patterns referring to sample SG1 (a), SG2 (b), SG3 (c) and SG4 (d) thermally treated at 100°C.
